# Supplementary material for: Azide–acetonitrile “click” reaction triggered by Cs2CO3: the atom-economic, high-yielding synthesis of 5-amino-1,2,3-triazoles
Source: Royal Society of Chemistry journal article supplement (doi:10.1039/c5ra12308a), 2015-01-01
Supplement: c5ra12308a2.pdf [file c5ra12308a2.pdf]

## Supporting Information-I

### NMR Spectral Data

### Azide-Acetonitrile “Click” Reaction Triggered by Cs<sub>2</sub>CO<sub>3</sub>: The Atom-Economic, High-yielding Synthesis of 5-Amino-1,2,3-Triazoles

**Patoju M. Krishna, Dhevalapally B. Ramachary,\* and  
Sruthi Peesapati**

*School of Chemistry, University of Hyderabad, Central University (P.O.),  
Hyderabad 500 046, India*

*Email: [ramsc@uohyd.ernet.in](mailto:ramsc@uohyd.ernet.in) and [ramchary.db@gmail.com](mailto:ramchary.db@gmail.com)*

**General Methods:** The <sup>1</sup>H NMR and <sup>13</sup>C NMR spectra were recorded at 400 MHz and 100 MHz respectively. The chemical shifts are reported in ppm downfield to TMS (δ = 0) for <sup>1</sup>H NMR and relative to the central CDCl<sub>3</sub> resonance (δ = 77.0) for <sup>13</sup>C NMR. *In the <sup>13</sup>C NMR spectra, the nature of the carbons (C, CH, CH<sub>2</sub> or CH<sub>3</sub>) was determined by recording the DEPT-135 experiment, and is given in parentheses.* The coupling constants *J* are given in Hz. Column chromatography was performed using Acme’s silica gel (particle size 0.063-0.200 mm). High-resolution mass spectra were recorded on micromass ESI-TOF MS. GCMS mass spectrometry was performed on Shimadzu GCMS-QP2010 mass spectrometer. IR spectra were recorded on JASCO FT/IR-5300 and Thermo Nicolet FT/IR-5700. Elemental analyses were recorded on a Thermo Finnigan Flash EA 1112 analyzer. Mass spectra were recorded on either VG7070H mass spectrometer using EI technique or Shimadzu-LCMS-2010 A mass spectrometer. The X-ray diffraction measurements were carried out at 298 K on an automated Enraf-Nonious MACH 3 diffractometer using graphite monochromated, Mo-Kα (λ = 0.71073 Å) radiation with CAD4 software or the X-ray intensity data were measured at 298 K on a Bruker SMART APEX CCD area detector system equipped with a graphite monochromator and a Mo-Kα fine-focus sealed

tube ( $\lambda = 0.71073 \text{ \AA}$ ). For thin-layer chromatography (TLC), silica gel plates Merck 60 F254 were used and compounds were visualized by irradiation with UV light and/or by treatment with a solution of *p*-anisaldehyde (23 mL), conc.  $\text{H}_2\text{SO}_4$  (35 mL), acetic acid (10 mL), and ethanol (900 mL) followed by heating.

**Materials:** All solvents and commercially available chemicals were used as received.

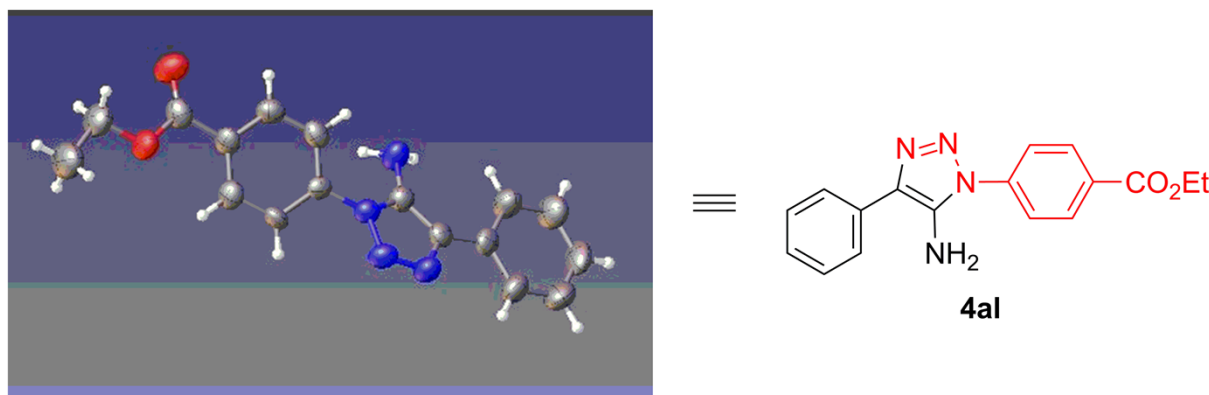

**Figure S1.** Crystal structure of ethyl 4-(5-amino-4-phenyl-1*H*-1,2,3-triazol-1-yl)benzoate (**4al**).

#### General Experimental Procedures:

##### **Procedure A:** General Procedure for the $\text{Cs}_2\text{CO}_3$ -catalyzed Domino [3+2]-Cycloaddition

**Reactions:** In an ordinary glass vial equipped with a magnetic stirring bar, to 0.05 mmol of catalyst **3e** in  $\text{DMSO}+\text{H}_2\text{O}$  (7:3; 0.5 M), was added 0.6 mmol of aryl azide **2** and 0.5 mmol of monosubstituted acetonitrile **1** and the reaction mixture was stirred at  $25^\circ\text{C}$  for 0.5-2.0 h. The crude reaction mixture was worked up with aqueous  $\text{NH}_4\text{Cl}$  solution and the aqueous layer was extracted with dichloromethane (2 x 20 mL). The combined organic layers were dried ( $\text{Na}_2\text{SO}_4$ ), filtered and concentrated. Pure domino products **4** were obtained by column chromatography (silica gel, mixture of hexane/ethyl acetate).

##### **Procedure B:** General Procedure for the *t*BuOK-catalyzed Domino [3+2]-Cycloaddition

**Reactions:** In an ordinary glass vial equipped with a magnetic stirring bar, to 0.1 mmol of catalyst **3f** in  $\text{DMSO}$  (0.5 M), was added 0.6 mmol of aryl azide **2** and 0.5 mmol of

monosubstituted acetonitrile **1** and the reaction mixture was stirred at 25 °C for 0.5-2.0 h. The crude reaction mixture was worked up with aqueous NH<sub>4</sub>Cl solution and the aqueous layer was extracted with dichloromethane (2 x 20 mL). The combined organic layers were dried (Na<sub>2</sub>SO<sub>4</sub>), filtered and concentrated. Pure domino products **4** were obtained by column chromatography (silica gel, mixture of hexane/ethyl acetate).

**Procedure C: General Procedure for the DBU-catalyzed Domino [3+2]-Cycloaddition**

**Reactions:** In an ordinary glass vial equipped with a magnetic stirring bar, to 0.05 mmol of catalyst **3a** in DMSO (0.5 M), was added 0.6 mmol of aryl azide **2** and 0.5 mmol of monosubstituted acetonitrile **1** and the reaction mixture was stirred at 25 °C for 1-2 h. The crude reaction mixture was worked up with aqueous NH<sub>4</sub>Cl solution and the aqueous layer was extracted with dichloromethane (2 x 20 mL). The combined organic layers were dried (Na<sub>2</sub>SO<sub>4</sub>), filtered and concentrated. Pure domino products **4** were obtained by column chromatography (silica gel, mixture of hexane/ethyl acetate).

**Procedure D: General Procedure for the Dimroth Rearrangement of Triazoles 4ga and 4ja:**

4-(4-Methoxyphenyl)-1-phenyl-1*H*-1,2,3-triazol-5-amine **4ga** (0.5 mmol) and toluene (2.0 ml) were added in a seal tube and resulting suspension was refluxed at 180 °C for 6 h. Pure product **6ga** were obtained by column chromatography (silica gel, mixture of hexane/ethyl acetate).

**1,4-Diphenyl-1*H*-1,2,3-triazolo-5-amine (4aa):**<sup>[1]</sup> Prepared following the procedure **A** and

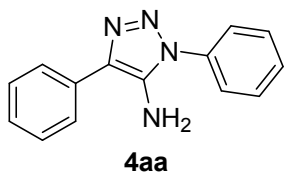

purified by column chromatography using EtOAc/hexane and was isolated as a white solid. Mp 177-178 °C [Lit., M.P. 179 °C]; IR (KBr):  $\nu_{\text{max}}$  3443, 3364, 1600, 1515, 1381, 1270, 1239, 1103, 1070, 969, 763 and 713 cm<sup>-1</sup>; <sup>1</sup>H NMR (CDCl<sub>3</sub>)  $\delta$  7.74 (2H, d, *J* = 7.2 Hz), 7.61-7.55

(4H, m), 7.52-7.51 (1H, m), 7.46 (2H, t, *J* = 8.0 Hz), 7.31 (1H, t, *J* = 7.6 Hz), 4.13 (2H, s, NH<sub>2</sub>); <sup>13</sup>C NMR (CDCl<sub>3</sub>, DEPT-135)  $\delta$  137.4 (C), 135.1 (C), 131.4 (C), 129.9 (2 x CH), 129.8 (C), 129.4 (CH), 129.0 (2 x CH), 127.0 (CH), 125.6 (2 x CH), 124.3 (2 x CH); HRMS *m/z* 237.1131 (M + H<sup>+</sup>), calcd for C<sub>14</sub>H<sub>12</sub>N<sub>4</sub>H 237.1140.

**1-(4-Fluorophenyl)-4-phenyl-1*H*-1,2,3-triazol-5-amine (4ab):** Prepared following the

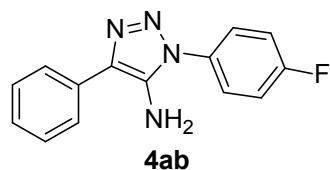

procedure [A](#) and purified by column chromatography using EtOAc/hexane and isolated as a white solid. Mp 132-134 °C; IR (neat):  $\nu_{\max}$  3413, 3320, 1604, 1517, 1440, 1243, 991, 832, 760 and 700  $\text{cm}^{-1}$ ;  $^1\text{H}$  NMR (DMSO- $d_6$ , 400 MHz)  $\delta$  7.87 (2H, br d,  $J$  = 7.2 Hz), 7.72-7.69 (2H, m), 7.49-7.44 (4H, m), 7.29 (1H, t,  $J$  = 7.6 Hz), 5.85 (2H, s,  $\text{NH}_2$ );  $^{13}\text{C}$  NMR (DMSO- $d_6$ , DEPT-135)  $\delta$  162.6 (C, d,  $J$  = 244.0 Hz, C-F), 140.0 (C), 132.5 (C), 132.3 (C, d,  $J$  = 3.0 Hz), 129.2 (2 x CH), 128.2 (C), 127.8 (2 x CH, d,  $J$  = 9.0 Hz), 126.7 (CH), 125.6 (2 x CH), 117.1 (2 x CH, d,  $J$  = 23.0 Hz); HRMS  $m/z$  255.1038 ( $\text{M} + \text{H}^+$ ), calcd for  $\text{C}_{14}\text{H}_{11}\text{FN}_4\text{H}$  255.1046.

**1-(3-Chlorophenyl)-4-phenyl-1*H*-1,2,3-triazol-5-amine (4ac):** Prepared following the

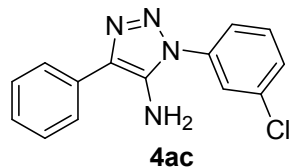

procedure [A](#) and purified by column chromatography using EtOAc/hexane and was isolated as a light yellow solid. Mp 124-126 °C; IR (neat):  $\nu_{\max}$  3294, 1621, 1594, 1425, 1382, 1261, 1221, 1074, 984, 783, 764 and 715  $\text{cm}^{-1}$ ;  $^1\text{H}$  NMR (DMSO- $d_6$ , 500 MHz)  $\delta$  7.81 (2H, d,  $J$  = 7.5 Hz), 7.74 (1H, m), 7.65-7.61 (3H, m), 7.45 (2H, t,  $J$  = 8.0 Hz), 7.28 (1H, t,  $J$  = 7.5 Hz), 5.92 (2H, s,  $\text{NH}_2$ );  $^{13}\text{C}$  NMR (DMSO- $d_6$ , DEPT-135)  $\delta$  139.9 (C), 137.1 (C), 134.3 (C), 132.2 (C), 131.8 (CH), 129.3 (CH), 129.1 (2 x CH), 128.2 (C), 126.7 (CH), 125.5 (2 x CH), 125.0 (CH), 123.8 (CH); HRMS  $m/z$  271.0735 ( $\text{M} + \text{H}^+$ ), calcd for  $\text{C}_{14}\text{H}_{11}\text{ClN}_4\text{H}$  271.0750.

**1-(4-Chlorophenyl)-4-phenyl-1*H*-1,2,3-triazol-5-amine (4ad):**<sup>[5]</sup> Prepared following the

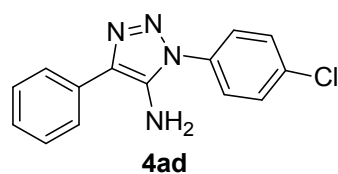

procedure [A](#) and purified by column chromatography using EtOAc/hexane and was isolated as a light yellow solid. Mp 180-182 °C [Lit., M.P. 181-182 °C]; IR (neat):  $\nu_{\max}$  3419, 3323, 1612, 1498, 1444, 1407, 1382, 1259, 1093, 982, 819, and 769  $\text{cm}^{-1}$ ;  $^1\text{H}$  NMR (DMSO- $d_6$ , 500 MHz)  $\delta$  7.81 (2H, d,  $J$  = 7.5 Hz), 7.68 (4H, m), 7.45 (2H, t,  $J$  = 7.5 Hz), 7.28 (1H, t,  $J$  = 7.5 Hz), 5.86 (2H, s,  $\text{NH}_2$ );  $^{13}\text{C}$  NMR (DMSO- $d_6$ , DEPT-135)  $\delta$  139.9 (C), 134.7 (C), 133.9 (C), 132.3 (C), 130.2 (2 x CH), 129.1 (2 x CH), 128.2 (C), 127.0 (2 x CH), 126.7 (CH), 125.5 (2 x CH); HRMS  $m/z$  271.0750 ( $\text{M} + \text{H}^+$ ), calcd for  $\text{C}_{14}\text{H}_{11}\text{ClN}_4\text{H}$  271.0750.

**1-(4-Bromophenyl)-4-phenyl-1*H*-1,2,3-triazol-5-amine (4ae):**<sup>[5]</sup> Prepared following the

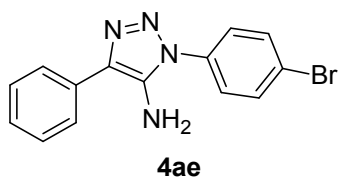

procedure **A** and purified by column chromatography using EtOAc/hexane and was isolated as a white solid. Mp 185-187 °C [Lit., M.P. 185-187 °C]; IR (neat):  $\nu_{\max}$  3314, 2920, 2851, 1610, 1508, 1444, 1259, 1070, 980, 908, 832, 815, 769 and 716  $\text{cm}^{-1}$ ;  $^1\text{H}$

NMR (DMSO- $d_6$ , 400 MHz)  $\delta$  7.81 (2H, br d,  $J = 7.2$  Hz), 7.79 (2H, br d,  $J = 7.2$  Hz), 7.60 (2H, br d,  $J = 8.8$  Hz), 7.44 (2H, t,  $J = 8.0$  Hz), 7.27 (1H, t,  $J = 7.2$  Hz), 5.86 (2H, s,  $\text{NH}_2$ );  $^{13}\text{C}$  NMR (DMSO- $d_6$ , DEPT-135)  $\delta$  139.8 (C), 135.1 (C), 133.1 (2 x CH), 132.2 (C), 129.1 (2 x CH), 128.2 (C), 127.2 (2 x CH), 126.6 (CH), 125.5 (2 x CH), 122.3 (C); HRMS  $m/z$  315.0249 ( $\text{M} + \text{H}^+$ ), calcd for  $\text{C}_{14}\text{H}_{11}\text{BrN}_4\text{H}$  315.0245.

**1-(2-Bromophenyl)-4-phenyl-1*H*-1,2,3-triazol-5-amine (4af):** Prepared following the

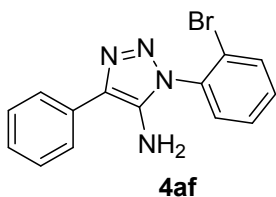

procedure **A** and purified by column chromatography using EtOAc/hexane and was isolated as a white solid. Mp 120-122 °C; IR (neat):  $\nu_{\max}$  3402, 3161, 3073, 1599, 1561, 1467, 1308, 1265, 1020, 991, 914 and 739  $\text{cm}^{-1}$ ;  $^1\text{H}$  NMR (DMSO- $d_6$ , 400 MHz)  $\delta$  7.91 (1H, br d,  $J = 7.6$  Hz), 7.83 (2H, br d,  $J = 7.2$  Hz), 7.65-7.54 (3H, m), 7.43 (2H, t,  $J = 7.6$  Hz), 7.25 (1H, t,  $J = 7.2$  Hz), 5.82 (2H, s,  $\text{NH}_2$ );  $^{13}\text{C}$  NMR (DMSO- $d_6$ , DEPT-135)  $\delta$  140.9 (C), 134.6 (C), 134.1 (CH), 132.7 (CH), 132.6 (C), 130.8 (CH), 129.6 (CH), 129.1 (2 x CH), 126.5 (C), 126.3 (CH), 125.0 (2 x CH), 122.3 (C); HRMS  $m/z$  315.0249 ( $\text{M} + \text{H}^+$ ), calcd for  $\text{C}_{14}\text{H}_{11}\text{BrN}_4\text{H}$  315.0245.

**4-Phenyl-1-(p-tolyl)-1*H*-1,2,3-triazol-5-amine (4ag):**<sup>[6]</sup> Prepared following the procedure **A**

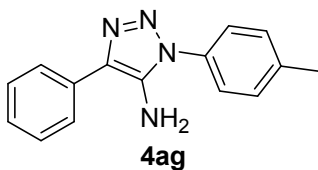

and purified by column chromatography using EtOAc/hexane and was isolated as a white solid. Mp 172-174 °C [Lit., M.P. 176 °C]; IR (Neat):  $\nu_{\max}$  3375, 3282, 1600, 1517, 1441, 1260, 1106, 986, 832, 772, 695 and 498  $\text{cm}^{-1}$ ;  $^1\text{H}$  NMR (DMSO- $d_6$ , 400 MHz)  $\delta$  7.83 (2H,

d,  $J = 7.2$  Hz), 7.51-7.41 (6H, m), 7.27 (1H, t,  $J = 7.2$  Hz), 5.72 (2H, s,  $\text{NH}_2$ ), 3.43 (3H, s, Ar- $\text{CH}_3$ );  $^{13}\text{C}$  NMR (DMSO- $d_6$ , DEPT-135)  $\delta$  139.7 (C), 139.1 (C), 133.3 (C), 132.5 (C), 130.6 (2 x CH), 129.1 (2 x CH), 128.1 (C), 126.6 (CH), 125.5 (2 x CH), 125.1 (2 x CH), 21.3 ( $\text{CH}_3$ ); HRMS  $m/z$  251.1290 ( $\text{M} + \text{H}^+$ ), calcd for  $\text{C}_{15}\text{H}_{14}\text{N}_4\text{H}$  251.1297.

**1-(Naphthalen-1-yl)-4-phenyl-1*H*-1,2,3-triazol-5-amine (4ah):** Prepared following the

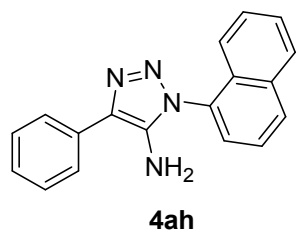

procedure [A](#) and purified by column chromatography using EtOAc/hexane and isolated as a semi solid; IR (neat):  $\nu_{\text{max}}$  3315, 3194, 1625, 1606, 1508, 1404, 1264, 1023, 991, 803, 770, 733  $\text{cm}^{-1}$ ;  $^1\text{H}$  NMR (DMSO- $d_6$ , 400 MHz)  $\delta$  8.21 (1H, d,  $J$  = 7.6 Hz), 8.13 (1H, d,  $J$  = 7.6 Hz), 7.89 (2H, d,  $J$  = 7.2 Hz), 7.75-7.69 (2H, m), 7.67-7.635 (1H, m), 7.63-7.58 (1H, m), 7.46 (2H, t,  $J$  = 7.6 Hz), 7.33-7.26 (2H, m), 5.72 (2H, s,  $\text{NH}_2$ );  $^{13}\text{C}$  NMR (DMSO- $d_6$ , DEPT-135)  $\delta$  141.5 (C), 134.5 (C), 132.7 (C), 131.6 (C), 130.9 (CH), 130.0 (C), 129.2 (2 x CH), 128.9 (CH), 128.2 (CH), 127.5 (CH), 126.8 (C), 126.6 (CH), 126.5 (CH), 126.4 (CH), 125.3 (2 x CH), 123.0 (CH); HRMS  $m/z$  287.1288 ( $\text{M} + \text{H}^+$ ), calcd for  $\text{C}_{18}\text{H}_{14}\text{N}_4\text{H}$  287.1297.

**1-(4-Methoxyphenyl)-4-phenyl-1*H*-1,2,3-triazol-5-amine (4ai):**<sup>[6]</sup> Prepared following the

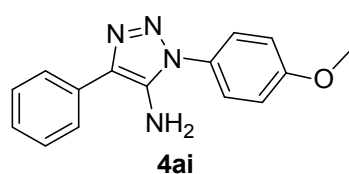

procedure [A](#) and purified by column chromatography using EtOAc/hexane and isolated as a white solid. Mp 162-164 °C [Lit., M.P. 163-164 °C]; IR (neat):  $\nu_{\text{max}}$  3458, 3305, 2851, 1623, 1507, 1463, 1440, 1248, 1036, 979, 908, 832 and 771  $\text{cm}^{-1}$ ;  $^1\text{H}$  NMR

(DMSO- $d_6$ , 400 MHz)  $\delta$  7.79 (2H, d,  $J$  = 7.6 Hz), 7.50 (2H, d,  $J$  = 8.8 Hz), 7.43 (2H, t,  $J$  = 7.6 Hz), 7.26 (1H, t,  $J$  = 7.2 Hz), 7.15 (2H, d,  $J$  = 9.2 Hz), 5.64 (2H, s,  $\text{NH}_2$ ), 3.85 (3H, s,  $\text{OCH}_3$ );  $^{13}\text{C}$  NMR (DMSO- $d_6$ , DEPT-135)  $\delta$  160.1 (C), 139.8 (C), 132.5 (C), 129.1 (2 x CH), 128.6 (C), 127.8 (C), 127.0 (2 x CH), 126.5 (CH), 125.4 (2 x CH), 115.3 (2 x CH), 56.1 ( $\text{CH}_3$ ); HRMS  $m/z$  267.1240 ( $\text{M} + \text{H}^+$ ), calcd for  $\text{C}_{15}\text{H}_{14}\text{N}_4\text{OH}$  267.1246.

**4-Phenyl-1-(4-(trifluoromethyl)phenyl)-1*H*-1,2,3-triazol-5-amine (4aj):** Prepared following

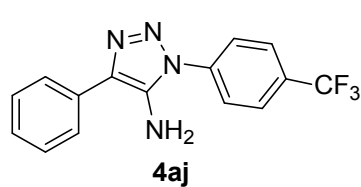

the procedure [A](#) and purified by column chromatography using EtOAc/hexane and was isolated as a white solid. Mp 170-172 °C; IR (neat): 3079, 2920, 2859, 1714, 1643, 1467, 1380, 1319, 991, 914 and 722  $\text{cm}^{-1}$ ;  $^1\text{H}$  NMR (DMSO- $d_6$ , 400 MHz)  $\delta$  8.00 (2H, d,  $J$

= 8.4 Hz), 7.92 (2H, d,  $J$  = 8.4 Hz), 7.83 (2H, d,  $J$  = 7.6 Hz), 7.46 (2H, t,  $J$  = 7.6 Hz), 7.29 (1H, t,  $J$  = 7.6 Hz), 6.00 (2H, s,  $\text{NH}_2$ );  $^{13}\text{C}$  NMR (DMSO- $d_6$ , DEPT-135)  $\delta$  140.0 (C), 139.3 (C), 132.2 (C), 129.5 (C, q,  $J$  = 32.0 Hz), 129.2 (2 x CH), 128.6 (C), 127.3 (2 x CH, q,  $J$  = 4.0 Hz), 126.8

(CH), 125.7 (2 x CH), 125.5 (2 x CH), 124.5 (CF<sub>3</sub>, q,  $J = 270.0$  Hz); HRMS  $m/z$  305.1002 ( $M + H^+$ ), calcd for C<sub>15</sub>H<sub>11</sub>F<sub>3</sub>N<sub>4</sub>H 305.1014.

**4-(5-Amino-4-phenyl-1*H*-1,2,3-triazol-1-yl)benzonitrile (4ak):** Prepared following the procedure **A** and purified by column chromatography using

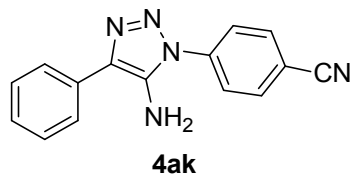

EtOAc/hexane and was isolated as a light yellow solid. Mp 150-152 °C; IR (neat):  $\nu_{\max}$  3409, 3320, 2233, 1609, 1516, 1444, 1413, 1381, 1262, 1128, 1070, 982, 847, and 771 cm<sup>-1</sup>; <sup>1</sup>H NMR (DMSO-d<sub>6</sub>,

400 MHz)  $\delta$  8.10 (2H, br d,  $J = 8.4$  Hz), 7.90 (2H, br d,  $J = 8.4$  Hz), 7.81 (2H, br d,  $J = 7.2$  Hz), 7.46 (2H, br t,  $J = 8.0$  Hz), 7.29 (1H, br t,  $J = 7.2$  Hz), 6.02 (2H, s, NH<sub>2</sub>); <sup>13</sup>C NMR (DMSO-d<sub>6</sub>, DEPT-135)  $\delta$  139.9 (C), 139.6 (C), 134.4 (2 x CH), 132.0 (C), 129.2 (2 x CH), 128.6 (C), 126.9 (CH), 125.7 (2 x CH), 125.4 (2 x CH), 118.8 (C), 111.7 (C); HRMS  $m/z$  262.1095 ( $M + H^+$ ), calcd for C<sub>15</sub>H<sub>11</sub>N<sub>5</sub>H 262.1093.

**Ethyl 4-(5-amino-4-phenyl-1*H*-1,2,3-triazol-1-yl)benzoate (4al):** Prepared following the procedure **C** and purified by column chromatography using

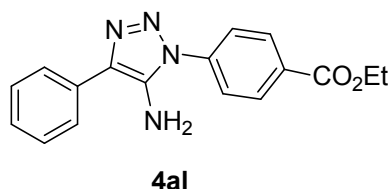

EtOAc/hexane and was isolated as a light yellow solid. Mp 110-112 °C; IR (neat):  $\nu_{\max}$  3413, 3320, 2920, 1715, 1621, 1419, 1271, 1106, 865, 772, 695 cm<sup>-1</sup>; <sup>1</sup>H NMR (DMSO-d<sub>6</sub>, 400 MHz)

$\delta$  8.18 (2H, br d,  $J = 8.0$  Hz), 7.82 (2H, br d,  $J = 8.0$  Hz), 7.80 (2H, br d,  $J = 8.0$  Hz), 7.45 (2H, br t,  $J = 7.6$  Hz), 7.28 (1H, br t,  $J = 7.2$  Hz), 5.95 (2H, s, NH<sub>2</sub>), 4.37 (2H, q,  $J = 6.8$  Hz), 1.35 (3H, t,  $J = 6.8$  Hz); <sup>13</sup>C NMR (DMSO-d<sub>6</sub>, DEPT-135)  $\delta$  165.6 (C, C=O), 139.9 (C), 139.6 (C), 132.2 (C), 131.2 (2 x CH), 130.3 (C), 129.2 (2 x CH), 128.5 (C), 126.8 (CH), 125.7 (2 x CH), 124.8 (2 x CH), 61.7 (CH<sub>2</sub>), 14.7 (CH<sub>3</sub>); HRMS  $m/z$  309.1346 ( $M + H^+$ ), calcd for C<sub>17</sub>H<sub>16</sub>N<sub>4</sub>O<sub>2</sub>H 309.1352.

**4-(5-Amino-4-phenyl-1*H*-1,2,3-triazol-1-yl)benzaldehyde (4am):** Prepared following the procedure **C** and purified by column chromatography using

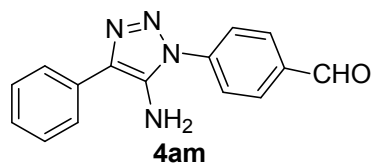

EtOAc/hexane and isolated as a White solid. Mp 120-122 °C; IR (neat):  $\nu_{\max}$  3385, 3277, 1705, 1603, 1578, 1514, 1443, 1420, 1375, 1302, 1203, 1167, 1023, 982, 829 and 766 cm<sup>-1</sup>; <sup>1</sup>H NMR

(DMSO-d<sub>6</sub>, 500 MHz)  $\delta$  10.13 (1H, s, CHO), 8.15 (2H, d,  $J = 8.5$  Hz), 7.91 (2H, d,  $J = 8.0$  Hz), 7.80 (2H, d,  $J = 7.5$  Hz), 7.46 (2H, t,  $J = 7.5$  Hz), 7.29 (1H, t,  $J = 7.5$  Hz), 6.00 (2H, s, NH<sub>2</sub>); <sup>13</sup>C



NMR (DMSO- $d_6$ , 100 MHz)  $\delta$  193.0 (CHO, C), 140.5 (C), 139.9 (C), 136.1 (C), 132.1 (C), 131.4 (2 x CH), 129.2 (2 x CH), 128.5 (C), 126.8 (CH), 125.6 (2 x CH), 125.0 (2 x CH); HRMS  $m/z$  265.1078 ( $M + H^+$ ), calcd for  $C_{15}H_{12}N_4OH$  265.1089.

**1-(2-Nitrophenyl)-4-phenyl-1*H*-1,2,3-triazol-5-amine (4an):** Prepared following the procedure

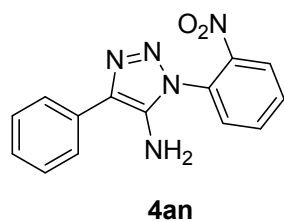

**A** and purified by column chromatography using EtOAc/hexane and isolated as a White solid. Mp 135-137 °C; IR (neat):  $\nu_{\max}$  3303, 3150, 1615, 1588, 1522, 1440, 1347, 1270, 1139, 980, 766, 739 and 700  $cm^{-1}$ ;  $^1H$  NMR (DMSO- $d_6$ , 400 MHz)  $\delta$  8.28 (1H, dd,  $J = 8.0, 1.2$  Hz), 7.98 (1H, dt,  $J = 7.6, 1.2$  Hz), 7.89-7.81 (4H, m), 7.45 (2H, t,  $J = 7.6$  Hz),

7.28 (1H, t,  $J = 7.2$  Hz), 6.06 (2H, s,  $NH_2$ );  $^{13}C$  NMR (DMSO- $d_6$ , DEPT-135)  $\delta$  145.8 (C), 141.2 (CH), 135.3 (CH), 132.2 (C), 131.8 (C), 130.3 (CH), 129.1 (2 x CH), 128.3 (C), 127.1 (C), 126.5 (CH), 126.1 (CH), 125.2 (2 x CH); LCMS  $m/z$  282.40 ( $M + H^+$ ), calcd for  $C_{14}H_{11}N_5O_2H$  282.0991.

**1-Benzyl-4-phenyl-1*H*-1,2,3-triazol-5-amine (4ao):**<sup>[7]</sup> Prepared following the procedure **B** and

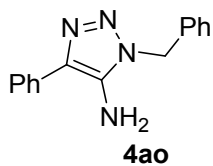

purified by column chromatography using EtOAc/hexane and was isolated as a White solid. Mp 155-156 °C [Lit., M.P. 156 °C]; IR (neat):  $\nu_{\max}$  3314, 3203, 1637, 1605, 1586, 1518, 1496, 1445, 1368, 1251, 1225, 1114, 1073, 993, 803, 767 and 718  $cm^{-1}$ ;  $^1H$  NMR (DMSO- $d_6$ , 400 MHz)  $\delta$  7.18 (2H, br

d,  $J = 6.4$  Hz), 6.85-6.78 (4H, m), 6.75-6.64 (4H, m), 5.31 (2H, s,  $NH_2$ ), 4.91 (2H, s,  $NCH_2Ph$ );  $^{13}C$  NMR (DMSO- $d_6$ , DEPT-135)  $\delta$  139.7 (C), 136.8 (C), 132.8 (C), 129.1 (2 x CH), 129.0 (2 x CH), 128.1 (CH), 127.9 (2 x CH), 127.7 (C), 126.2 (CH), 125.0 (2 x CH), 48.9 ( $CH_2$ ); HRMS  $m/z$  251.1299 ( $M + H^+$ ), calcd for  $C_{15}H_{14}N_4H$  251.1297.

**1-Phenethyl-4-phenyl-1*H*-1,2,3-triazol-5-amine (4ap):** Prepared following the procedure **B**

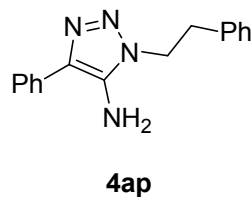

and purified by column chromatography using EtOAc/hexane and was isolated as a white solid. Mp 126-128 °C; IR (neat):  $\nu_{\max}$  3298, 3177, 1632, 1582, 1528, 1445, 1265, 1073, 1007, 760, and 706  $cm^{-1}$ ;  $^1H$  NMR (DMSO- $d_6$ , 400 MHz)  $\delta$  7.74 (2H, br d,  $J = 7.2$  Hz), 7.41 (2H, br t,  $J = 7.6$  Hz), 7.32-7.31 (4H, m), 7.25-7.21 (2H, m), 5.80 (2H, s,  $NH_2$ ), 4.41 (2H, t,  $J =$

8.0 Hz), 3.10 (2H, t,  $J = 8.0$  Hz);  $^{13}C$  NMR (DMSO- $d_6$ , DEPT-135)  $\delta$  139.4 (C), 138.4 (C), 132.9



(C), 129.4 (2 x CH), 129.0 (2 x CH), 128.8 (2 x CH), 127.7 (C), 126.9 (CH), 126.1 (CH), 125.0 (2 x CH), 46.9 (CH<sub>2</sub>), 35.0 (CH<sub>2</sub>); LCMS *m/z* 265.00 (*M* + *H*<sup>+</sup>), calcd for C<sub>16</sub>H<sub>16</sub>N<sub>4</sub>H 265.1453.

**4-(2-Fluorophenyl)-1-phenyl-1*H*-1,2,3-triazol-5-amine (4ba):** Prepared following the

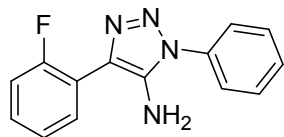

**4ba**

procedure **A** and purified by column chromatography using EtOAc/hexane and was isolated as a white solid. Mp 132-134 °C; IR (neat):  $\nu_{\text{max}}$  3352, 1606, 1512, 1451, 1374, 1222, 1197, 1106, 979, 820 and 760 cm<sup>-1</sup>; <sup>1</sup>H NMR (DMSO-*d*<sub>6</sub>, 500 MHz)  $\delta$  7.70-7.61 (5H, m), 7.54

(1H, tt, *J* = 7.0, 1.2 Hz), 7.43-7.39 (1H, m), 7.32-7.29 (2H, m), 5.65 (2H, s, NH<sub>2</sub>); <sup>13</sup>C NMR (DMSO-*d*<sub>6</sub>, DEPT-135)  $\delta$  159.4 (C, d, *J* = 245.0 Hz, C-F), 140.8 (C), 136.0 (C), 130.7 (CH, d, *J* = 3.0 Hz), 130.2 (2 x CH), 129.5 (CH, d, *J* = 8.0 Hz), 129.3 (CH), 125.1 (CH), 124.8 (2 x CH), 123.8 (C), 119.9 (C, d, *J* = 14.0 Hz), 116.4 (CH, d, *J* = 21.0 Hz); HRMS *m/z* 255.1037 (*M* + *H*<sup>+</sup>), calcd for C<sub>14</sub>H<sub>11</sub>FN<sub>4</sub>H 255.1046.

**4-(3-Fluorophenyl)-1-phenyl-1*H*-1,2,3-triazol-5-amine (4ca):** Prepared following the

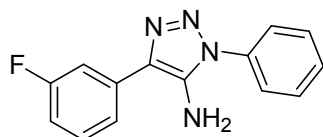

**4ca**

procedure **A** and purified by column chromatography using EtOAc/hexane and was isolated as a white solid. Mp 152-154 °C; IR (neat): 3401, 3330, 1161, 1500, 1434, 1383, 1278, 1263, 1191, 1161, 1024, 987, 869, and 756 cm<sup>-1</sup>; <sup>1</sup>H NMR (DMSO-*d*<sub>6</sub>, 500 MHz)  $\delta$  7.70

(1H, d, *J* = 8.0 Hz), 7.64-7.63 (5H, m), 7.58-7.55 (1H, m), 7.48 (1H, q, *J* = 8.0 Hz), 7.09 (1H, t, *J* = 8.5 Hz), 5.95 (2H, s, NH<sub>2</sub>); <sup>13</sup>C NMR (DMSO-*d*<sub>6</sub>, DEPT-135)  $\delta$  163.0 (C, d, *J* = 240 Hz), 140.1 (C), 135.6 (C), 134.7 (C, d, *J* = 12.5 Hz), 131.0 (CH, d, *J* = 8.75 Hz), 130.2 (2 x CH), 129.5 (CH), 126.9 (C), 125.2 (2 x CH), 121.3 (CH, d, *J* = 2.5 Hz), 113.0 (CH, d, *J* = 21.25 Hz); 111.7 (CH, d, *J* = 22.5 Hz); LRMS *m/z* 255.00 (*M* + *H*<sup>+</sup>), calcd for C<sub>14</sub>H<sub>11</sub>FN<sub>4</sub>H 255.1046.

**4-(4-Fluorophenyl)-1-phenyl-1*H*-1,2,3-triazol-5-amine (4da):**<sup>[2]</sup> Prepared following the

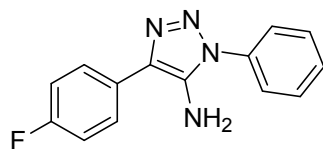

**4da**

procedure **A** and purified by column chromatography using EtOAc/hexane and was isolated as a white solid. Mp 188-190 °C [Lit., M.P. 192 °C]; IR (neat):  $\nu_{\text{max}}$  3286, 3192, 1612, 1576, 1517, 1452, 1381, 1221, 1091, 983, 909, 835 and 816 cm<sup>-1</sup>; <sup>1</sup>H NMR

(DMSO-*d*<sub>6</sub>, 500 MHz)  $\delta$  7.84 (2H, m), 7.63-7.62 (4H, m), 7.56 (1H, m), 7.28 (2H, br t, *J* = 9.0 Hz), 5.79 (2H, s, NH<sub>2</sub>); <sup>13</sup>C NMR (DMSO-*d*<sub>6</sub>, DEPT-135)  $\delta$  161.2 (C, d, *J* = 241 Hz), 139.5 (C), 135.8 (C), 130.2 (2 x CH), 129.4 (CH), 128.9 (C, d, *J* = 2.5 Hz), 127.5 (C), 127.4 (2 x CH, d, *J* =

8.75 Hz), 125.1 (2 x CH), 115.9 (2 x CH, d,  $J = 21.25$  Hz); HRMS  $m/z$  255.1047 ( $M + H^+$ ), calcd for  $C_{14}H_{11}FN_4H$  255.1046.

**4-(4-Chlorophenyl)-1-phenyl-1*H*-1,2,3-triazol-5-amine (4ea):**<sup>[2]</sup> Prepared following the

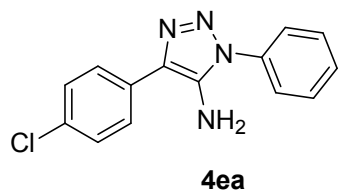

procedure **A** and purified by column chromatography using EtOAc/hexane and was isolated as a yellow solid. Mp 188-190 °C [Lit., M.P. 189 °C]; IR (Neat):  $\nu_{max}$  3398, 3280, 1623, 1509, 1454, 1402, 1380, 1257, 1093, 986, 910, 832, 823, 768, 750, and 720  $cm^{-1}$

$^1H$  NMR (DMSO- $d_6$ , 500 MHz)  $\delta$  7.83 (2H, d,  $J = 8.5$  Hz), 7.65-7.61 (4H, m), 7.57-7.55 (1H, m), 7.49 (2H, d,  $J = 9.0$  Hz), 5.87 (2H, s,  $NH_2$ );  $^{13}C$  NMR (DMSO- $d_6$ , DEPT-135)  $\delta$  139.9 (C), 135.7 (C), 131.3 (C), 130.8 (C), 130.2 (2 x CH), 129.5 (CH), 129.0 (2 x CH), 127.0 (2 x CH, C), 125.2 (2 x CH); HRMS  $m/z$  271.0743 ( $M + H^+$ ), calcd for  $C_{14}H_{11}ClN_4H$  271.0750.

**4-(3-Bromophenyl)-1-phenyl-1*H*-1,2,3-triazol-5-amine (4fa):** Prepared following the

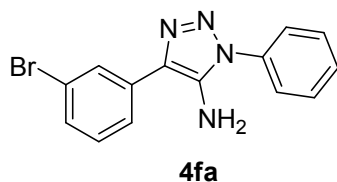

procedure **A** and purified by column chromatography using EtOAc/hexane and isolated as a light yellow solid. Mp 112-114 °C; IR (neat):  $\nu_{max}$  3348, 1601, 1574, 1510, 1452, 1410, 1379, 1278, 1254, 1122, 1068, 993, 983, 877, 787, 767, 752  $cm^{-1}$ ;  $^1H$  NMR

(DMSO- $d_6$ , 500 MHz)  $\delta$  7.98 (1H, t,  $J = 2.0$  Hz), 7.83 (1H, td,  $J = 8.0, 1.0$  Hz), 7.65-7.61 (4H, m), 7.58-7.55 (1H, m), 7.46-7.44 (1H, m), 7.41-7.38 (1H, t,  $J = 8.0$  Hz), 5.96 (2H, s,  $NH_2$ );  $^{13}C$  NMR (DMSO- $d_6$ , DEPT-135)  $\delta$  140.2 (C), 135.6 (C), 134.8 (C), 131.2 (CH), 130.2 (2 x CH), 129.6 (CH), 129.1 (CH), 127.6 (CH), 126.6 (C), 125.3 (2 x CH), 124.1 (CH), 122.7 (C); HRMS  $m/z$  315.0239 ( $M + H^+$ ), calcd for  $C_{14}H_{11}BrN_4H$  315.0245.

**4-(4-Bromophenyl)-1-phenyl-1*H*-1,2,3-triazol-5-amine (4ga):**<sup>[3]</sup> Prepared following the

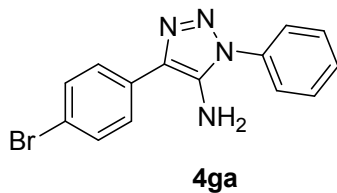

procedure **A** and purified by column chromatography using EtOAc/hexane and was isolated as a solid; Mp 188-190 °C [Lit., M.P. 191 °C]; IR (KBr): 3364, 3298, 1616, 1512, 1457, 1402, 1265, 1073, 1002, 832, 767 and 701  $cm^{-1}$ ;  $^1H$  NMR (DMSO- $d_6$ , 500

MHz)  $\delta$  7.80 (2H, d,  $J = 8.5$  Hz), 7.63-7.62 (6H, m), 7.56 (1H, m), 5.91 (2H, s,  $NH_2$ );  $^{13}C$  NMR (DMSO- $d_6$ , DEPT-135)  $\delta$  139.9 (C), 135.7 (C), 131.9 (2 x CH), 131.6 (C), 130.2 (2 x CH), 129.5 (CH), 127.4 (2 x CH), 127.1 (C), 125.1 (2 x CH), 119.3 (C); HRMS  $m/z$  315.0246 ( $M + H^+$ ), calcd for  $C_{14}H_{11}BrN_4H$  315.0245.

**1-Phenyl-4-(m-tolyl)-1H-1,2,3-triazol-5-amine (4ha):** Prepared following the procedure A and

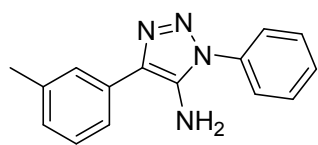

**4ha**

purified by column chromatography using EtOAc/hexane and isolated as a White solid. Mp 113-114 °C; IR (neat):  $\nu_{\text{max}}$  3298, 3208, 1631, 1598, 1515, 1455, 1369, 1270, 1044, 980, 916, 854, 781 and 722  $\text{cm}^{-1}$ ;  $^1\text{H}$  NMR (DMSO- $d_6$ , 400 MHz)  $\delta$  7.64-7.61 (6H, m), 7.58-7.53 (1H, m), 7.33 (1H, t,  $J = 7.6$  Hz), 7.09 (1H, br d,  $J = 7.6$  Hz), 5.76 (2H, s,  $\text{NH}_2$ ), 2.38 (3H, s, Ar- $\text{CH}_3$ );  $^{13}\text{C}$  NMR (DMSO- $d_6$ , DEPT-135)  $\delta$  139.6 (C), 138.2 (C), 135.9 (C), 132.3 (C), 130.2 (2 x CH), 129.4 (CH), 129.0 (CH), 128.2 (C), 127.3 (CH), 126.1 (CH), 125.0 (2 x CH), 122.7 (CH), 21.7 ( $\text{CH}_3$ ); LCMS  $m/z$  249.10 ( $\text{M} - \text{H}^+$ ), calcd for  $\text{C}_{15}\text{H}_{13}\text{N}_4$  249.1140.

**1-Phenyl-4-(p-tolyl)-1H-1,2,3-triazol-5-amine (4ia):**<sup>[5]</sup> Prepared following the procedure A and

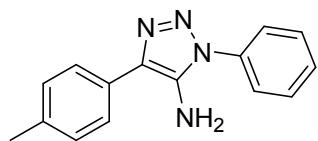

**4ia**

purified by column chromatography using EtOAc/hexane and was isolated as a yellow solid. Mp 180-182 °C [Lit., M.P. 179-181 °C]; IR (neat):  $\nu_{\text{max}}$  3274, 3195, 1616, 1594, 1579, 1518, 1503, 1452, 1378, 1245, 980 and 708  $\text{cm}^{-1}$ ;  $^1\text{H}$  NMR (DMSO- $d_6$ , 400 MHz)  $\delta$  7.69 (2H, br d,  $J = 8.0$  Hz), 7.63-7.61 (4H, m), 7.57-7.53 (1H, m), 7.25 (2H, br d,  $J = 7.6$  Hz), 5.66 (2H, s,  $\text{NH}_2$ ), 2.34 (3H, s, Ar- $\text{CH}_3$ );  $^{13}\text{C}$  NMR (DMSO- $d_6$ , DEPT-135)  $\delta$  139.4 (C), 135.9 (C), 135.8 (C), 130.2 (2 x CH), 129.7 (2 x CH), 129.6 (C), 129.4 (CH), 128.4 (C), 125.5 (2 x CH), 125.1 (2 x CH), 21.3 ( $\text{CH}_3$ ); HRMS  $m/z$  251.1294 ( $\text{M} + \text{H}^+$ ), calcd for  $\text{C}_{15}\text{H}_{14}\text{N}_4\text{H}$  251.1297.

**4-(4-Methoxyphenyl)-1-phenyl-1H-1,2,3-triazol-5-amine (4ja):**<sup>[2]</sup> Prepared following the

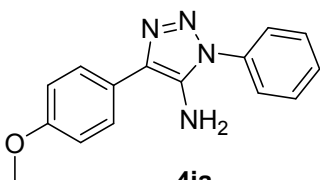

**4ja**

procedure A and purified by column chromatography using EtOAc/hexane and was isolated as a white solid. Mp 162-164 °C [Lit., M.P. 164 °C]; IR (KBr):  $\nu_{\text{max}}$  3362, 1599, 1565, 1509, 1453, 1382, 1237, 1105, 1026, 833 and 771  $\text{cm}^{-1}$ ;  $^1\text{H}$  NMR (DMSO- $d_6$ , 500 MHz)  $\delta$  7.44 (2H, d,  $J = 8.5$  Hz), 7.33-7.31 (4H, m), 7.26-7.24 (1H, m), 6.73 (2H, d,  $J = 8.5$  Hz), 5.34 (2H, s,  $\text{NH}_2$ ), 3.50 (3H, s, Ar- $\text{OCH}_3$ );  $^{13}\text{C}$  NMR (DMSO- $d_6$ , DEPT-135)  $\delta$  158.2 (C), 138.9 (C), 135.9 (C), 130.1 (2 x CH), 129.3 (CH), 128.5 (C), 127.0 (2 x CH, C), 124.9 (2 x CH), 114.5 (2 x CH), 55.6 ( $\text{CH}_3$ ); HRMS  $m/z$  267.1244 ( $\text{M} + \text{H}^+$ ), calcd for  $\text{C}_{15}\text{H}_{14}\text{N}_4\text{OH}$  267.1246.

**4-(5-Amino-1-phenyl-1H-1,2,3-triazol-4-yl)phenyl acetate (4ka):** Prepared following the

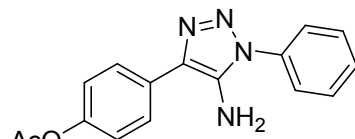

**4ka**

procedure A and purified by column chromatography using

EtOAc/hexane and was isolated as a oily liquid; IR (Neat):  $\nu_{\max}$  3430, 3331, 1751, 1620, 1515, 1370, 1274, 1217, 1190, 983, 911, 851, 767 and 718  $\text{cm}^{-1}$ ;  $^1\text{H}$  NMR (DMSO- $d_6$ , 400 MHz)  $\delta$  7.81 (2H, br d,  $J$  = 8.8 Hz), 7.63-7.62 (4H, m), 7.57-7.54 (1H, m), 7.19 (2H, br d,  $J$  = 8.4 Hz), 5.78 (2H, s,  $\text{NH}_2$ ), 2.29 (3H, s, Ar-OCOCH<sub>3</sub>);  $^{13}\text{C}$  NMR (DMSO- $d_6$ , DEPT-135)  $\delta$  169.8 (C, O-C=O), 149.2 (C), 139.7 (C), 135.8 (C), 130.2 (2 x CH), 130.0 (C), 129.5 (CH), 127.6 (C), 126.5 (2 x CH), 125.1 (2 x CH), 122.5 (2 x CH), 21.4 (CH<sub>3</sub>); HRMS  $m/z$  295.1188 (M + H<sup>+</sup>), calcd for C<sub>16</sub>H<sub>14</sub>N<sub>4</sub>O<sub>2</sub>H 295.1195.

**N-(4-(5-Amino-1-phenyl-1*H*-1,2,3-triazol-4-yl)phenyl)acetamide (4la):** Prepared following

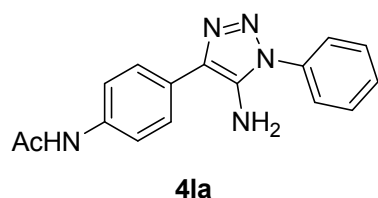

the procedure A and purified by column chromatography using EtOAc/hexane and was isolated as a semi solid; IR (neat):  $\nu_{\max}$  3575, 3301, 2923, 1661, 1601, 1514, 1442, 1408, 1373, 1318, 1286, 1110, 1019, 909, 810, 752, 694 and 653  $\text{cm}^{-1}$ ;  $^1\text{H}$  NMR

(DMSO- $d_6$ , 500 MHz)  $\delta$  10.00 (1H, s), 7.72 (2H, d,  $J$  = 8.5 Hz), 7.66 (2H, d,  $J$  = 8.5 Hz), 7.63-7.62 (4H, m), 7.55 (1H, m), 5.69 (2H, s,  $\text{NH}_2$ ), 2.07 (3H, s, Ar-NHCOCH<sub>3</sub>);  $^{13}\text{C}$  NMR (CDCl<sub>3</sub>, DEPT-135)  $\delta$  168.6 (NH-C=O, C), 139.1 (C), 138.0 (C), 135.9 (C), 130.1 (2 x CH), 129.3 (CH), 128.2 (C), 127.1 (C), 125.8 (2 x CH), 125.0 (2 x CH), 119.6 (2 x CH), 24.5 (CH<sub>3</sub>); HRMS  $m/z$  294.1353 (M + H<sup>+</sup>), calcd for C<sub>16</sub>H<sub>15</sub>N<sub>5</sub>OH 294.1355.

**1-Phenyl-4-(4-(trifluoromethyl)phenyl)-1*H*-1,2,3-triazol-5-amine (4ma):** Prepared following

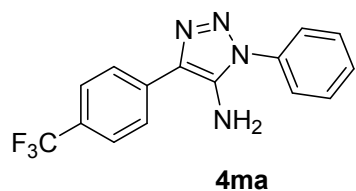

the procedure A and purified by column chromatography using EtOAc/hexane and was isolated as a light yellow solid. Mp 168-170 °C; IR (neat):  $\nu_{\max}$  3435, 3326, 1617, 1506, 1453, 1412, 1318, 1280, 1239, 1166, 1072, 982, 840, 736 and 712  $\text{cm}^{-1}$ ;  $^1\text{H}$  NMR

(DMSO- $d_6$ , 400 MHz)  $\delta$  8.03 (2H, d,  $J$  = 8.5 Hz), 7.77 (2H, d,  $J$  = 8.0 Hz), 7.66-7.61 (4H, m), 7.59-7.56 (1H, m), 6.05 (2H, s,  $\text{NH}_2$ );  $^{13}\text{C}$  NMR (DMSO- $d_6$ , 125 MHz)  $\delta$  140.0 (C), 139.3 (C), 132.2 (C), 129.5 (C, q,  $J$  = 32.5 Hz), 129.2 (2 x CH), 128.6 (C), 127.4 (2 x CH, q,  $J$  = 3.75 Hz), 126.9 (CH), 125.7 (2 x CH), 125.5 (2 x CH), 124.5 (C, q,  $J$  = 270 Hz); HRMS  $m/z$  305.1016 (M + H<sup>+</sup>), calcd for C<sub>15</sub>H<sub>11</sub>F<sub>3</sub>N<sub>4</sub>H 305.1014.

**4-(5-Amino-1-phenyl-1*H*-1,2,3-triazol-4-yl)benzonitrile (4na):** Prepared following the

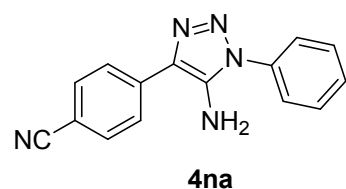

procedure A and purified by column chromatography using

EtOAc/hexane and was isolated as a semi solid; IR (neat):  $\nu_{\max}$  3405, 3282, 2229, 1613, 1503, 1452, 1408, 1260, 1226, 1128, 1047, 1024, 984, 909, 844 and 759  $\text{cm}^{-1}$ ;  $^1\text{H}$  NMR (DMSO- $d_6$ , 400 MHz)  $\delta$  8.00 (2H, br d,  $J = 8.4$  Hz), 7.86 (2H, br d,  $J = 8.4$  Hz), 7.66-7.55 (5H, m), 6.15 (2H, s,  $\text{NH}_2$ );  $^{13}\text{C}$  NMR (DMSO- $d_6$ , DEPT-135)  $\delta$  141.1 (C), 137.1 (C), 135.4 (C), 133.1 (2 x CH), 130.3 (2 x CH), 129.7 (CH), 126.2 (C), 125.43 (2 x CH), 125.38 (2 x CH), 119.7 (C), 108.2 (C, CN); LCMS  $m/z$  262.25 ( $\text{M} + \text{H}^+$ ), calcd for  $\text{C}_{15}\text{H}_{11}\text{N}_5$  262.1093.

**4-(2-Nitrophenyl)-1-phenyl-1*H*-1,2,3-triazol-5-amine (4oa):** Prepared following the procedure

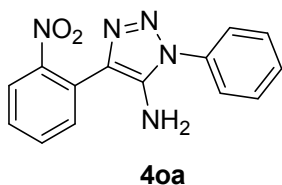

**A** and purified by column chromatography using EtOAc/hexane and was isolated as a white solid. Mp 185-187  $^{\circ}\text{C}$ ; IR (KBr):  $\nu_{\max}$  3450, 3354, 1625, 1524, 1494, 1358, 1307, 1268, 1219, 1073, 983, 951, 855, 781, 768, 733 and 718  $\text{cm}^{-1}$ ;  $^1\text{H}$  NMR (500 MHz, DMSO- $d_6$ )  $\delta$  7.96

(1H, dd,  $J = 8.0, 1.0$  Hz), 7.77-7.11 (2H, m), 7.65-7.63 (4H, m), 7.58-7.55 (2H, m), 6.00 (2H, s,  $\text{NH}_2$ );  $^{13}\text{C}$  NMR (DMSO- $d_6$ , DEPT-135)  $\delta$  148.6 (C), 140.8 (C), 135.7 (C), 133.0 (CH), 130.8 (CH), 130.2 (2 x CH), 129.4 (CH), 128.5 (CH), 125.4 (C), 124.7 (2 x CH), 124.7 (CH), 124.1 (C); HRMS  $m/z$  282.0992 ( $\text{M} + \text{H}^+$ ), calcd for  $\text{C}_{14}\text{H}_{11}\text{N}_5\text{O}_2\text{H}$ , 282.0991.

**2-(4-(5-Amino-1-phenyl-1*H*-1,2,3-triazol-4-yl)phenyl)acetonitrile (4pa):** Prepared following

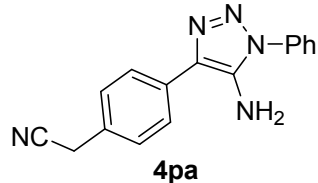

the procedure **A** and purified by column chromatography using EtOAc/hexane and was isolated as a yellow solid. Mp 146-148  $^{\circ}\text{C}$ ; IR (neat):  $\nu_{\max}$  3463, 3377, 1603, 1416, 1262, 1235, 1117, 971, 827, 728, 711  $\text{cm}^{-1}$ ;  $^1\text{H}$  NMR (DMSO- $d_6$ , 400 MHz)  $\delta$  7.82 (2H, br d,  $J = 8.0$

Hz), 7.63-7.61 (4H, m), 7.58-7.54 (1H, m), 7.41 (2H, br d,  $J = 8.4$  Hz), 5.82 (2H, s,  $\text{NH}_2$ ), 4.07 (2H, s,  $\text{Ar-CH}_2\text{CN}$ );  $^{13}\text{C}$  NMR (DMSO- $d_6$ , DEPT-135)  $\delta$  139.8 (C), 135.8 (C), 131.8 (C), 130.2 (2 x CH), 129.5 (CH), 129.3 (C), 128.9 (2 x CH), 127.5 (C), 125.9 (2 x CH), 125.2 (2 x CH), 119.9 (C), 22.6 ( $\text{CH}_2$ ,  $\text{Ar-CH}_2\text{CN}$ ); LCMS  $m/z$  276.15 ( $\text{M} + \text{H}^+$ ), calcd for  $\text{C}_{16}\text{H}_{13}\text{N}_5$  276.1249.

**4,4'-(1,4-Phenylene)bis(1-phenyl-1*H*-1,2,3-triazol-5-amine) (5pa):** Prepared following the

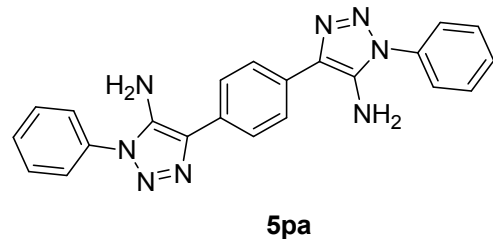

procedure **B** and purified by column chromatography using EtOAc/hexane and was isolated as a white solid. Mp 200-202  $^{\circ}\text{C}$ ; IR (neat):  $\nu_{\max}$  3402, 3319, 1617, 1523, 1505, 1451, 1413, 1378, 1294, 1256, 1242, 1132, 1052, 982, 907, 839 and 754  $\text{cm}^{-1}$ ;  $^1\text{H}$  NMR (DMSO- $d_6$ , 400

MHz)  $\delta$  7.89 (4H, s), 7.65-7.64 (8H, m), 7.57 (2H, m), 5.79 (4H, s, 2 x  $\text{NH}_2$ );  $^{13}\text{C}$  NMR (DMSO- $\text{d}_6$ , DEPT-135)  $\delta$  139.5 (2 x C), 135.8 (2 x C), 130.2 (4 x CH), 130.1 (2 x C), 129.4 (2 x CH), 128.1 (2 x C), 125.6 (4 x CH), 125.1 (4 x CH); HRMS  $m/z$  395.1744 ( $\text{M} + \text{H}^+$ ), calcd for  $\text{C}_{22}\text{H}_{19}\text{N}_8\text{H}$  395.1733.

**4,4'-(1,4-Phenylene)bis(1-benzyl-1H-1,2,3-triazol-5-amine) (5po):** Prepared following the

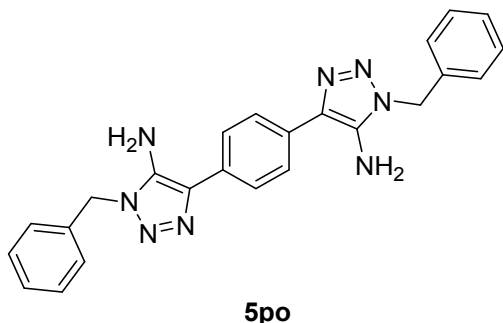

procedure **B** and purified by column chromatography using EtOAc/hexane and was isolated as a light yellow solid. Mp 220-222 °C; IR (neat):  $\nu_{\text{max}}$  3390, 3326, 3210, 1640, 1588, 1538, 1361, 1251, 1117, 848 and 731  $\text{cm}^{-1}$ ;  $^1\text{H}$  NMR (DMSO- $\text{d}_6$ , 400 MHz)  $\delta$  7.78 (4H, s), 7.39-7.35 (4H, m), 7.32-7.26 (6H, m), 5.85 (4H, s, 2 x  $\text{NH}_2$ ), 5.48 (4H, s, 2 x  $\text{ArCH}_2\text{N}$ );  $^{13}\text{C}$

NMR (DMSO- $\text{d}_6$ , DEPT-135)  $\delta$  139.5 (2 x C), 136.8 (2 x C), 130.2 (2 x C), 129.0 (4 x CH), 128.1 (2 x CH), 127.9 (4 x CH), 127.8 (2 x C), 125.0 (4 x CH), 48.9 (2 x  $\text{CH}_2$ ); LRMS  $m/z$  423.65 ( $\text{M} + \text{H}^+$ ), calcd for  $\text{C}_{24}\text{H}_{22}\text{N}_8\text{H}$  423.2046.

**1,1'-(1,4-Phenylenebis(methylene))bis(4-phenyl-1H-1,2,3-triazol-5-amine) (5ar):** Prepared

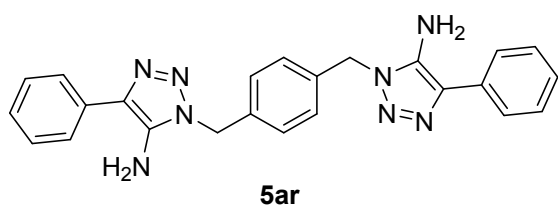

following the procedure **B** and purified by column chromatography using EtOAc/hexane and was isolated as a yellow solid. Mp 220-222 °C; IR (neat):  $\nu_{\text{max}}$  3321, 3213, 1644, 1589, 1548, 1521,

1273, 1254, 1120, 989, 910, 833, 800, 764, 752 and 716  $\text{cm}^{-1}$ ;  $^1\text{H}$  NMR (DMSO- $\text{d}_6$ , 400 MHz)  $\delta$  7.74 (4H, d,  $J = 7.6$  Hz), 7.39 (4H, t,  $J = 7.6$  Hz), 7.25-7.20 (6H, m), 5.84 (4H, s, 2 x  $\text{NH}_2$ ), 5.46 (4H, s, 2 x  $\text{ArCH}_2\text{N}$ );  $^{13}\text{C}$  NMR (DMSO- $\text{d}_6$ , DEPT-135)  $\delta$  139.6 (2 x C), 136.2 (2 x C), 132.8 (2 x C), 128.9 (4 x CH), 128.1 (4 x CH), 127.8 (2 x C), 126.2 (2 x CH), 125.0 (4 x CH), 48.6 (2 x  $\text{CH}_2$ ); HRMS  $m/z$  423.2044 ( $\text{M} + \text{H}^+$ ), calcd for  $\text{C}_{24}\text{H}_{22}\text{N}_8\text{H}$  423.2046.

**4-(4-Bromophenyl)-N-phenyl-1H-1,2,3-triazol-5-amine (6ga):**<sup>[4]</sup> Prepared following the

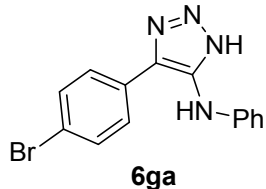

procedure **D** and purified by column chromatography using EtOAc/hexane and was isolated as a light yellow solid. Mp 140-142 °C; IR (neat):  $\nu_{\text{max}}$  3391, 3161, 2920, 1610, 1545, 1501, 1402, 1315, 1068,

1019, 986, 827, 756, 695  $\text{cm}^{-1}$ ;  $^1\text{H}$  NMR (DMSO- $d_6$  + TFA (three drops), 400 MHz)  $\delta$  7.74 (2H, d,  $J$  = 8.4 Hz), 7.61 (2H, d,  $J$  = 8.8 Hz), 7.14 (2H, t,  $J$  = 7.6 Hz), 6.91 (2H, d,  $J$  = 7.6 Hz), 6.72 (1H, t,  $J$  = 7.2 Hz);  $^{13}\text{C}$  NMR (DMSO- $d_6$  + TFA (three drops), DEPT-135)  $\delta$  145.4 (C), 143.5 (C), 135.3 (C), 132.2 (2 x CH), 130.1 (C), 129.5 (2 x CH), 128.8 (2 x CH), 121.5 (C), 119.3 (CH), 115.2 (2 x CH); HRMS  $m/z$  315.0230 ( $M + H^+$ ), calcd for  $\text{C}_{14}\text{H}_{11}\text{BrN}_4\text{H}$  315.0245.

**4-(4-Methoxyphenyl)-N-phenyl-1H-1,2,3-triazol-5-amine (6ja):** Prepared following the

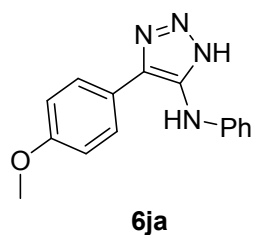

procedure **D** and purified by column chromatography using EtOAc/hexane and was isolated as a light yellow solid. Mp 160-162  $^{\circ}\text{C}$ ; IR (neat):  $\nu_{\text{max}}$  3409, 3168, 1598, 1552, 1497, 1463, 1322, 1252, 1181, 1020, 982, 837, 744  $\text{cm}^{-1}$ ;  $^1\text{H}$  NMR (DMSO- $d_6$  + TFA (three drops), 400 MHz)  $\delta$  7.72 (2H, d,  $J$  = 8.4 Hz), 7.12 (2H, t,  $J$  = 7.6 Hz), 6.98 (2H, d,  $J$  = 8.4 Hz), 6.86 (2H, d,  $J$  = 7.6 Hz), 6.70 (1H, t,  $J$  = 7.2 Hz), 3.76 (3H, s, Ar- $\text{OCH}_3$ );  $^{13}\text{C}$  NMR (DMSO- $d_6$  + TFA (three drops), DEPT-135)  $\delta$  159.5 (C), 145.9 (C), 142.5 (C), 136.0 (C), 129.4 (2 x CH), 128.1 (2 x CH), 122.8 (C), 118.8 (CH), 114.8 (2 x CH), 114.6 (2 x CH), 55.6 ( $\text{CH}_3$ ); HRMS  $m/z$  267.1237 ( $M + H^+$ ), calcd for  $\text{C}_{15}\text{H}_{14}\text{N}_4\text{OH}$  267.1246.

**1-(4-(Azidomethyl)phenyl)-4-phenyl-1H-1,2,3-triazol-5-amine (4as):** Prepared following the

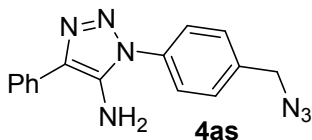

procedure **A** and purified by column chromatography using EtOAc/hexane and was isolated as a light yellow solid. Mp 125-127  $^{\circ}\text{C}$ ; IR (neat):  $\nu_{\text{max}}$  3435, 3347, 3068, 2926, 2849, 2093, 1627, 1523, 1419, 1342, 986, 827, 767, 695  $\text{cm}^{-1}$ ;  $^1\text{H}$  NMR (DMSO- $d_6$ , 400

MHz)  $\delta$  7.81 (2H, br d,  $J$  = 7.2 Hz), 7.67 (2H, d,  $J$  = 8.4 Hz), 7.62 (2H, d,  $J$  = 8.4 Hz), 7.45 (2H, t,  $J$  = 7.6 Hz), 7.27 (1H, t,  $J$  = 7.6 Hz), 5.82 (2H, s,  $\text{NH}_2$ ), 4.60 (2H, s, Ar- $\text{CH}_2\text{N}_3$ );  $^{13}\text{C}$  NMR (DMSO- $d_6$ , DEPT-135)  $\delta$  139.7 (C), 137.0 (C), 135.5 (C), 132.3 (C), 130.0 (2 x CH), 129.1 (2 x CH), 128.2 (C), 126.6 (CH), 125.5 (2 x CH), 125.2 (2 x CH), 53.5 ( $\text{CH}_2$ ); HRMS  $m/z$  292.1301 ( $M + H^+$ ), calcd for  $\text{C}_{15}\text{H}_{13}\text{N}_7\text{H}$  292.1311.

**1-(4-((5-Amino-4-(4-bromophenyl)-1H-1,2,3-triazol-1-yl)methyl)phenyl)-4-phenyl-1H-1,2,3-triazol-5-amine (5asg):**

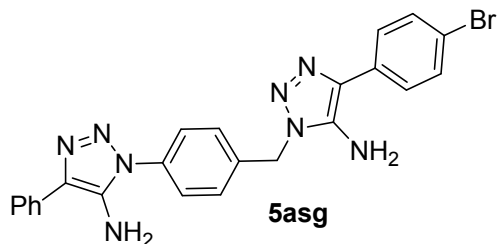

Prepared following the procedure **B** and purified by column chromatography using EtOAc/hexane and was isolated as a light yellow solid. Mp 180-182  $^{\circ}\text{C}$ ; IR



(neat): $\nu_{\max}$  3384(br), 1636, 1603, 1519, 1374, 1270, 1175, 1048, 1023, 995, 823, 761  $\text{cm}^{-1}$ ;  $^1\text{H}$  NMR ( $\text{DMSO-d}_6$ , 400 MHz)  $\delta$  7.80 (2H, d,  $J$  = 7.6 Hz), 7.74 (2H, d,  $J$  = 8.4 Hz), 7.65 (2H, d,  $J$  = 8.0 Hz), 7.60 (2H, d,  $J$  = 8.0 Hz), 7.52 (2H, d,  $J$  = 8.0 Hz), 7.44 (2H, t,  $J$  = 7.6 Hz), 7.27 (1H, t,  $J$  = 7.2 Hz), 6.08 (2H, s,  $\text{NH}_2$ ), 5.80 (2H, s,  $\text{NH}_2$ ), 5.62 (2H, s, Ar- $\text{CH}_2\text{N}$ );  $^{13}\text{C}$  NMR ( $\text{DMSO-d}_6$ , DEPT-135)  $\delta$  140.1 (C), 139.7 (C), 137.4 (C), 135.3 (C), 132.3 (C), 132.0 (C), 131.9 (2 x CH), 129.3 (2 x CH), 129.1 (2 x CH), 128.1 (C), 127.0 (2 x CH), 126.8 (C), 126.6 (CH), 125.5 (2 x CH), 125.3 (2 x CH), 119.0 (C), 48.5 ( $\text{CH}_2$ ); HRMS  $m/z$  487.0983 ( $\text{M}+\text{H}^+$ ), calcd for  $\text{C}_{23}\text{H}_{19}\text{N}_8\text{BrH}$  487.0994.

## References:

1. E. W. Warnhoff, D. G. Martin, W. S. Johnson, *Org. Syn.* **1957**, 37, 8-12.
2. P. A. S. Smith, J. J. Friar, W. Resemann, A. C. Watson, *J. Org. Chem.* **1990**, 55, 3351-3362.
3. X. Zhao, B. W. Lu, J. R. Lu, C. W. Xin, J. F. Li, Y. Liu, *Chinese Chem. Lett.* **2012**, 23, 933-935.
4. E. Lieber, T. S. Chao, C. N. Ramachandra Rao, *Org. Syn.* **1963**, 4, 380.
5. Zhao Xu et al, *Chem. Res. Chinese U.*, **2012**, 28, 424-429.
6. a) Zhao Qian et al, *Gaodeng Xuexiao Huaxue Xuebao*, **2011**, 32, 2806-2811; b) E. Lieber, T. -S. Chao, and C. N. R. Rao, *J. Org. Chem.* **1957**, 22, 654.
7. A. C. Tome, *Science of Synthesis*, **2004**, 13, 415-601.

**Table S1:** Compound Characterization Checklist.

| Entry | Compound    | New/Known | M.P                                | Reference |
|-------|-------------|-----------|------------------------------------|-----------|
| 1     | <b>4aa</b>  | known     | 177-178 °C [Lit., M.P. 179 °C]     | (a)       |
| 2     | <b>4ab</b>  | new       | 132-134 °C                         | —         |
| 3     | <b>4ac</b>  | new       | 124-126 °C                         | —         |
| 4     | <b>4ad</b>  | known     | 180-182 °C [Lit., M.P. 181-182 °C] | (b)       |
| 5     | <b>4ae</b>  | known     | 185-187 °C [Lit., M.P. 185-187 °C] | (b)       |
| 6     | <b>4af</b>  | new       | 120-122 °C                         | —         |
| 7     | <b>4ag</b>  | known     | 172-174 °C [Lit., M.P. 176 °C]     | (c)       |
| 8     | <b>4ah</b>  | new       | Semi solid                         | —         |
| 9     | <b>4ai</b>  | known     | 162-164 °C [Lit., M.P. 163-164 °C] | (c)       |
| 10    | <b>4aj</b>  | new       | 170-172 °C                         | —         |
| 11    | <b>4ak</b>  | new       | 150-152 °C                         | —         |
| 12    | <b>4al</b>  | new       | 110-112 °C                         | —         |
| 13    | <b>4am</b>  | new       | 120-122 °C                         | —         |
| 14    | <b>4an</b>  | new       | 135-137 °C                         | —         |
| 15    | <b>4ao</b>  | known     | 155-156 °C [Lit., M.P. 156 °C]     | (d)       |
| 16    | <b>4ap</b>  | new       | 126-128 °C                         | —         |
| 17    | <b>4ba</b>  | new       | 132-134 °C                         | —         |
| 18    | <b>4ca</b>  | new       | 152-154 °C                         | —         |
| 19    | <b>4da</b>  | known     | 188-190 °C [Lit., M.P. 192 °C]     | (e)       |
| 20    | <b>4ea</b>  | known     | 188-190 °C [Lit., M.P. 189 °C]     | (e)       |
| 21    | <b>4fa</b>  | new       | 112-114 °C                         | —         |
| 22    | <b>4ga</b>  | known     | 188-190 °C [Lit., M.P. 191 °C]     | (e)       |
| 23    | <b>4ha</b>  | new       | 113-114 °C                         | —         |
| 24    | <b>4ia</b>  | known     | 180-182 °C [Lit., M.P. 179-181 °C] | (b)       |
| 25    | <b>4ja</b>  | known     | 162-164 °C [Lit., M.P. 164 °C]     | (e)       |
| 26    | <b>4ka</b>  | new       | Oily liquid                        | —         |
| 27    | <b>4la</b>  | new       | Semi solid                         | —         |
| 28    | <b>4ma</b>  | new       | 168-170 °C                         | —         |
| 29    | <b>4na</b>  | new       | Semi solid                         | —         |
| 30    | <b>4oa</b>  | new       | 185-187 °C                         | —         |
| 31    | <b>4pa</b>  | new       | 146-147 °C                         | —         |
| 32    | <b>5pa</b>  | new       | 200-202 °C                         | —         |
| 33    | <b>5po</b>  | new       | 220-222 °C                         | —         |
| 34    | <b>5ar</b>  | new       | 220-222 °C                         | —         |
| 35    | <b>6ga</b>  | new       | 140-142 °C                         | —         |
| 36    | <b>6ja</b>  | new       | 160-162 °C                         | —         |
| 37    | <b>4as</b>  | new       | 125-127 °C                         | —         |
| 38    | <b>5asg</b> | new       | 180-182 °C                         | —         |

[a] E. Lieber, T. S. Chao and C. N. R. Rao, *Org. Synth.*, **1957**, 37, 26; [b] Zhao Xu et al, *Chem. Res. Chinese U.*, **2012**, 28, 424-429; [c] 1) Zhao Qian et al, *Gaodeng Xuexiao Huaxue Xuebao*, **2011**, 32, 2806-2811; 2) E. Lieber, T. S. Chao, and C. N. R. Rao, *J. Org. Chem.* **1957**, 22, 654; [d] A. C. Tome, *Science of Synthesis*, **2004**, 13, 415-601; [e] P. A. S. Smith, J. J. Friar, W. Resemann and A. C. Watson, *J. Org. Chem.*, **1990**, 55, 3351-3362.
